# Supplementary material for: Extremely tough and healable elastomer realized via reducing the crystallinity of its rigid domain
Source: Royal Society of Chemistry journal article supplement (doi:10.1039/d1py00870f), 2021-01-01
Supplement: d1py00870f1.pdf [file d1py00870f1.pdf]

Electronic Supplementary Information

## Extremely Tough and Healable Elastomer Realized via Reducing the Crystallinity of Rigid Domain

Chong Xing, Haomin Wu, Ruichun Du, Qihong Zhang\* and Xudong Jia\*

### Materials

Hexamethylene diisocyanate (HDI), poly (tetrahydrofuran) (PTMG,  $M_n = 1000$  g/mol) and dibutyltin dilaurate (DBTDL) were purchased from Sigma-Aldrich. 2,2-Bis (hydroxymethyl) propionic acid (DMPA) was purchased from J&K. **Anhydrous**  $\text{FeCl}_3$ ,  $\text{ZnCl}_2$  and  $\text{CuCl}_2$  were purchased from Alfa Aesar. *N,N*-dimethyl Formamide (DMF) was purchased from Shanghai Titan Chemistry Co., Ltd.. HDI, PTMG and DMPA should be dried at 85 °C in vacuum oven for 12h before used, DMF was distilled and preserved with 4A molecular sieve.

### Synthesis of metal ion-carboxyls coordinated PU

DBTDL catalyst (5  $\mu\text{L}$ ) was dropped into a mixture of dried HDI (12 mmol, 2.016 g) and dried PTMG ( $M_n = 1000$ , 6 mmol, 6.0 g) at 55 °C with argon protection to synthesize the prepolymer. After reaction for 1.5h, the temperature rose to 70 °C and a mixture of DMPA (0.804 g, 6 mmol) and **anhydrous**  $\text{FeCl}_3$ ,  $\text{ZnCl}_2$  or  $\text{CuCl}_2$  (0-1.5mmol, the detail amount could be found in **Table S1**.) was dissolved in distilled DMF and added to the prepolymer. After a 15-60min stirring (**FePU/CuPU** 15-30min, **ZnPU** ~60min), the viscous mixture was degassed and then transferred into a polytetrafluoroethylene plate and cured for 12h at 70 °C.

### Characterizations

The tensile tests were performed by stretching dumbbell samples with a rate of 50 mm/min under ambient atmosphere (23±2 °C) on an INSTRON 5944 machine. For self-healing test, the sample was cut into two pieces and then contacted with each other in 30 s, and then cured at 60±5 °C (40±10% RH). The fracture tests were carried out by using classical single-edge test and the calculation of fracture toughness ( $G_c$ ) was expressed by following equation:

$$G_c = \frac{2\pi\alpha W_c}{\sqrt{\lambda_c}}$$

where  $\alpha$  is the notch length,  $\lambda_c$  is the stretch ratio of notched samples,  $W_c$  is the strain energy calculated by integration of stress-strain curve of origin samples until  $\lambda_c$ . The detail data could be seen in **Table S2**, the  $W_0$  in **Table S2** is the toughness which calculated by integration of stress-strain curve of origin samples.

The ITC titration was carried out using a GE ITC200 instrument, samples were

prepared in a solution of anhydrous methanol at 25 °C. DMA tests were performed on a DMA Q800, samples were performed from -80 to 150 °C with a 0.2% strain, 10Hz. The fourier transform infrared spectra (FTIR) were recorded on a TENSOR27 spectrophotometer (ATR mode, scanned from 4000 to 400 cm<sup>-1</sup>).

The SAXS measurement was carried out using Beamline 4-2 at Stanford Synchrotron Radiation Lightsource (SSRL) of SLAC National Accelerator Laboratory (SLAC). The incident x-ray beam with an energy of 15 keV was used.

The XRD measurement was performed from a BRUKER D8 ADVANCE diffractometer with a Cu K $\alpha$  X-ray source ( $\lambda = 1.540598 \text{ \AA}$ ). The morphologies of polyurethane samples were observed by transmission electron microscopy (TEM) (JEM-2100), the sample was prepared by dropping diluted mixture of prepolymer and chain extender on bronze net and then cured at 70 °C for 12h.

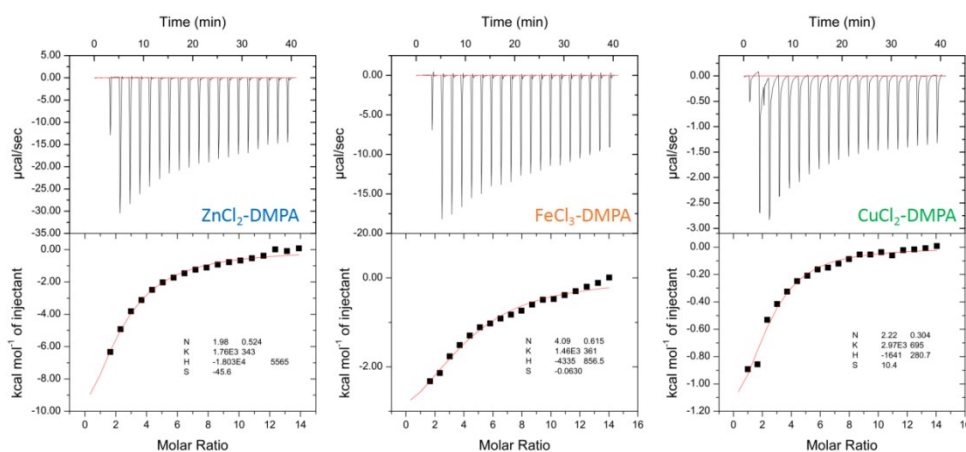

**Figure S1.** The ITC titration curve of the DMPA mixed with ZnCl<sub>2</sub>, FeCl<sub>3</sub> and CuCl<sub>2</sub> in anhydrous methanol at 25 °C.

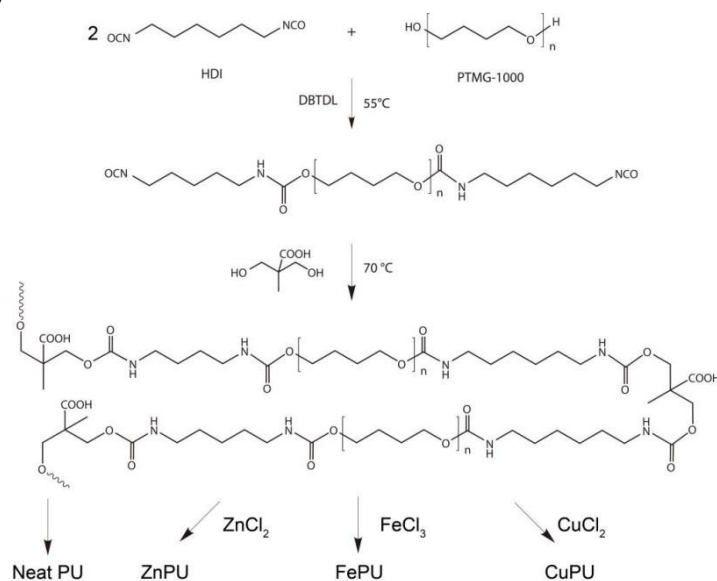

**Figure S2.** The detail synthetic route of Neat PU, FePU, ZnPU and CuPU.

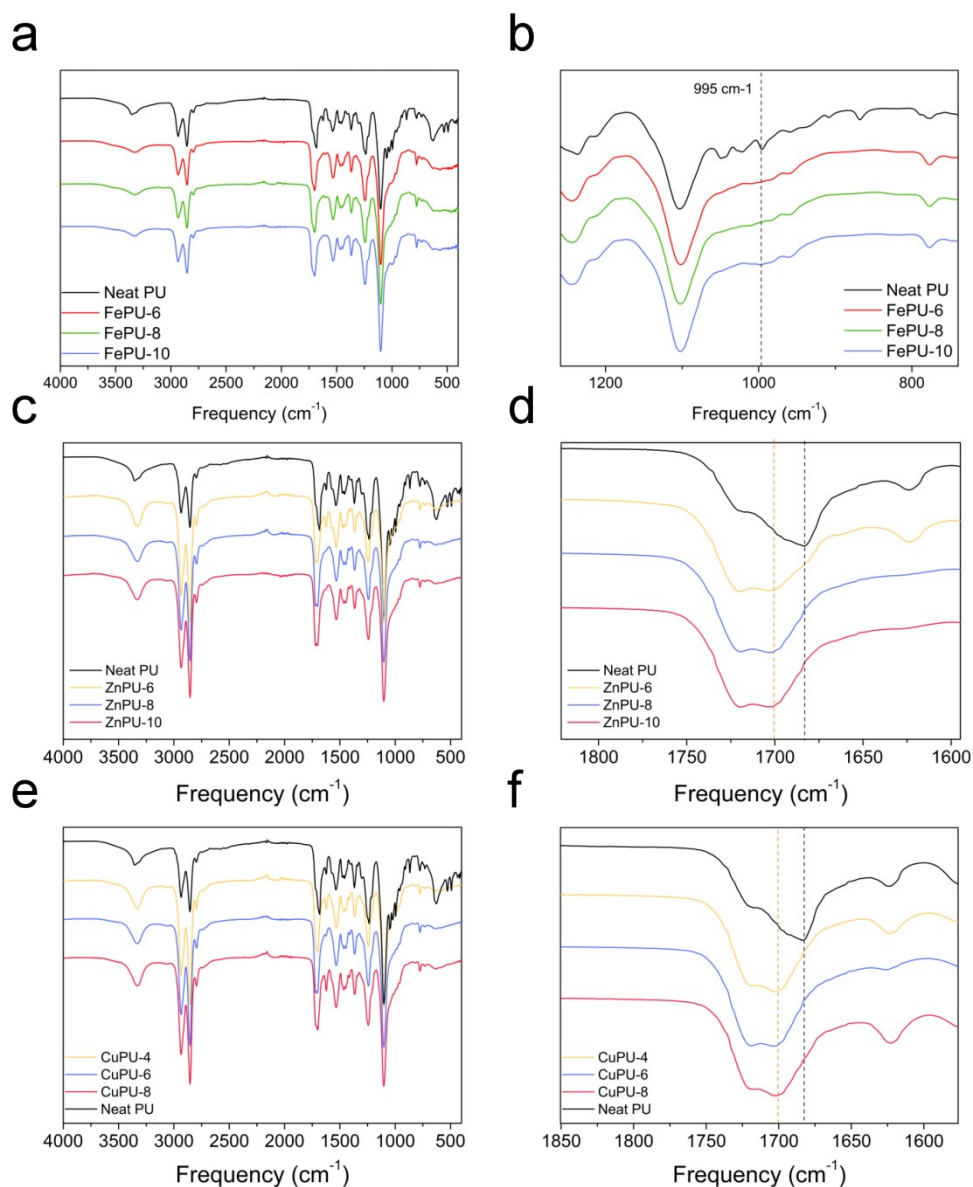

**Figure S3.** (a) FT-IR spectrum of **Neat PU**, **FePU-6**, **FePU-8** and **FePU-10** (b) Detail FT-IR spectrum of crystalline peak related to hard segment in **Neat PU**, **FePU-6**, **FePU-8** and **FePU-10**. (c) FT-IR spectrum of **Neat PU**, **ZnPU-6**, **ZnPU-8** and **ZnPU-10**. (d) Detail FT-IR spectrum of amide I region of **Neat PU**, **ZnPU-6**, **ZnPU-8** and **ZnPU-10**. (e) FT-IR spectrum of **Neat PU**, **CuPU-4**, **CuPU-6** and **CuPU-8**. (f) Detail FT-IR spectrum of amide I region of **Neat PU**, **CuPU-4**, **CuPU-6** and **CuPU-8**.

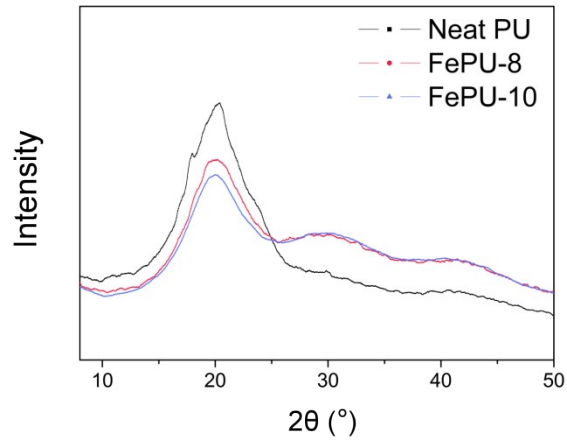

**Figure S4.** XRD of Neat PU, FePU-6 and FePU-8.

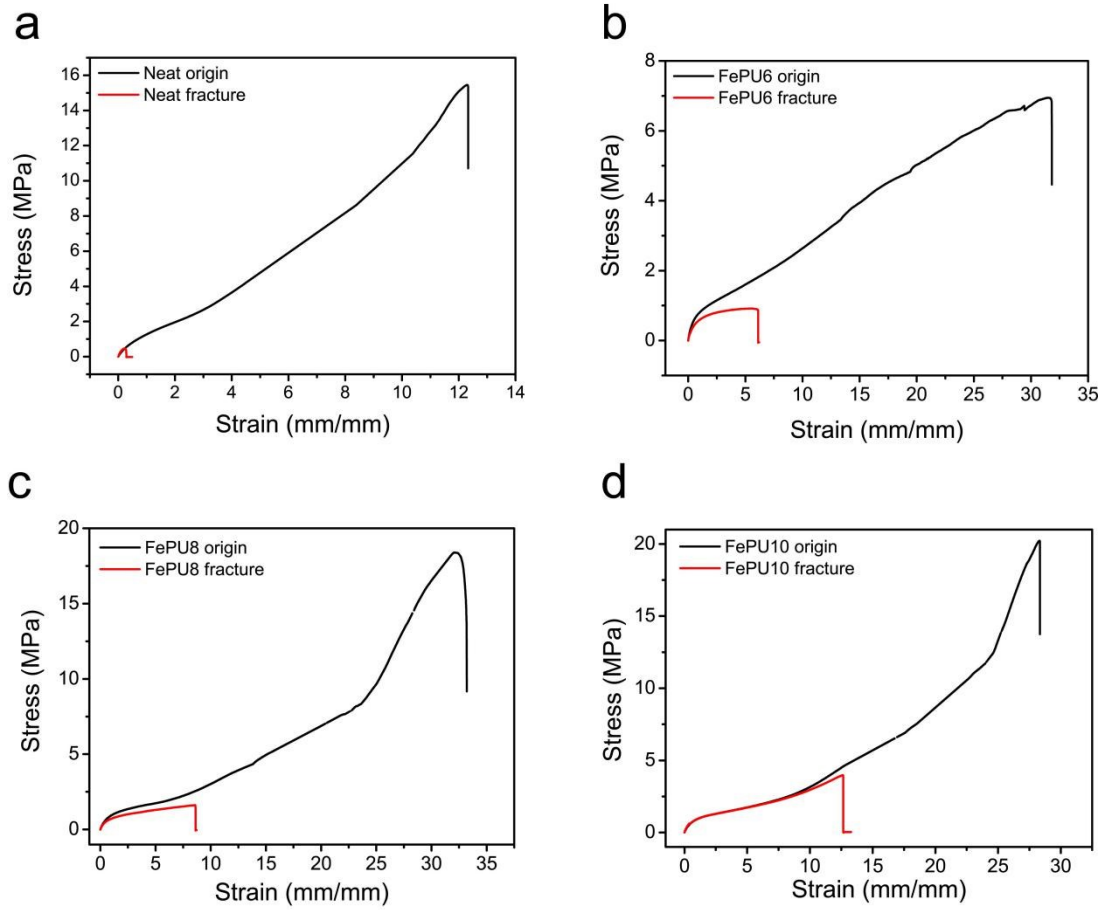

**Figure S5.** Stress–strain curves for a) Neat PU b) FePU-6 c) FePU-8 d) FePU-10 in single-edge test.

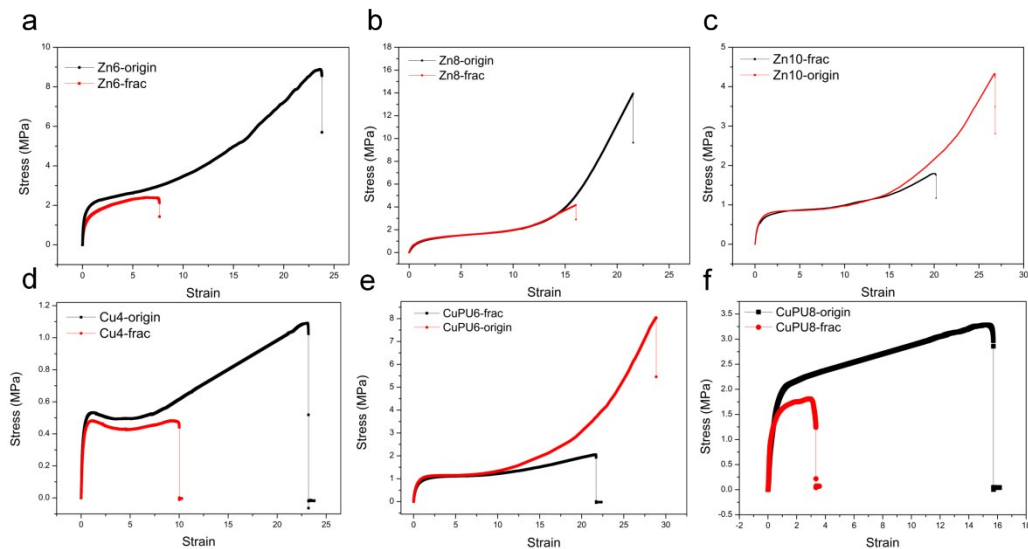

**Figure S6.** Stress–strain curves for a) **ZnPU-6** b) **ZnPU-8** c) **ZnPU-10** d) **CuPU-4**. e) **CuPU-6** and f) **CuPU-8** in single-edge test.

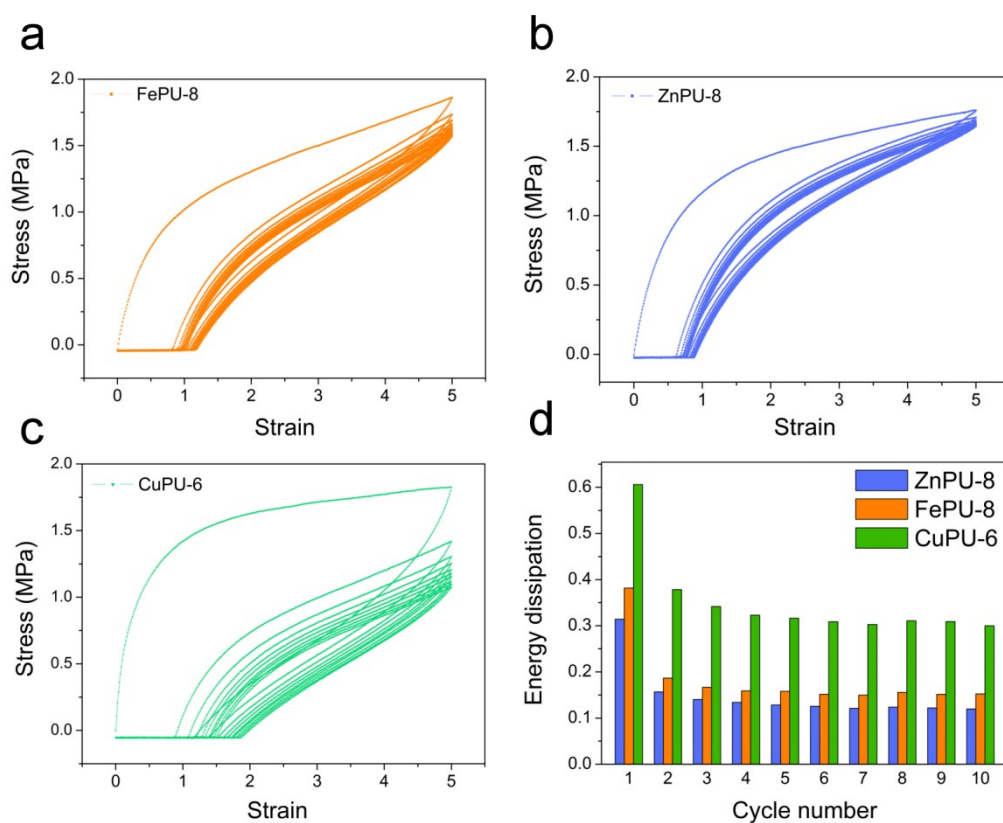

**Figure S7.** (a) The stress-strain curve in cycle tensile test of **FePU-8**. (b) The stress-strain curve in cycle tensile test of **ZnPU-8**. (c) The stress-strain curve in cycle tensile test of **CuPU-6**. (d) Energy dissipation in 1-10 cycles of **ZnPU-8** (blue), **FePU-8** (orange) and **CuPU-6** (green).

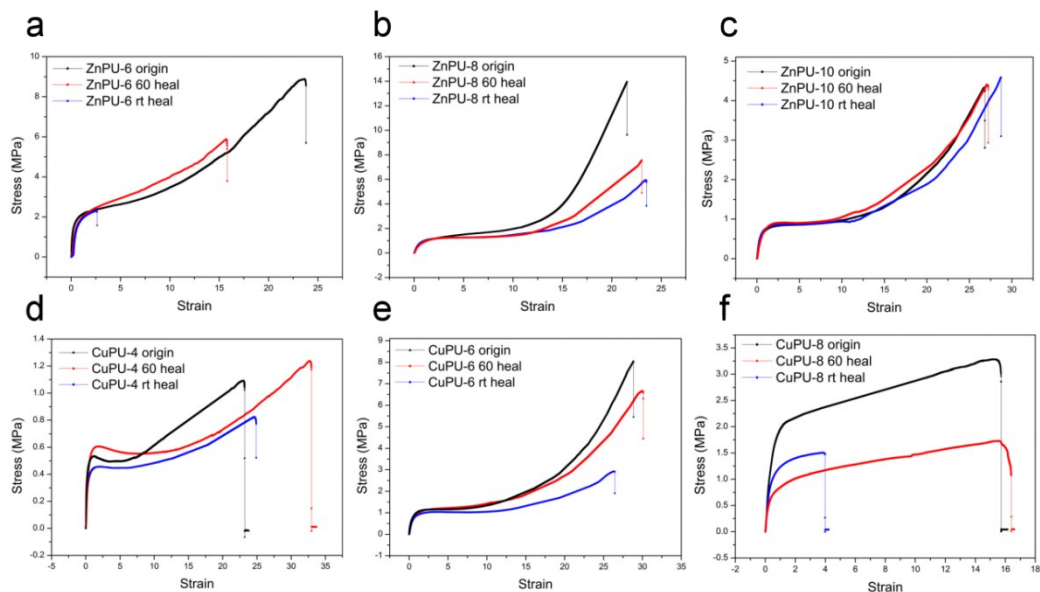

**Figure S8.** The stress-strain curve of hurt (a) **ZnPU-6** (b) **ZnPU-8** (c) **ZnPU-10** (d) **CuPU-4** (e) **CuPU-6** (f) **CuPU-8** after 24h self-healing at room temperature (blue) and 60 °C (red), the black line was their origin stress-strain curve.

**Table S1.** The dosage of each raw material applied in **Neat PU** and various metal ion-carboxyls coordinated PU.

| Sample ID      | n(HDI) / mmol | n(PTMG-1000) / mmol | n(DMPA) / mmol | n(metal salt) / mmol |
|----------------|---------------|---------------------|----------------|----------------------|
| <b>Neat PU</b> | 12            | 6                   | 6              | 0                    |
| <b>FePU-3</b>  | 12            | 6                   | 6              | 2                    |
| <b>FePU-4</b>  | 12            | 6                   | 6              | 1.5                  |
| <b>FePU-6</b>  | 12            | 6                   | 6              | 1                    |
| <b>FePU-8</b>  | 12            | 6                   | 6              | 0.75                 |
| <b>FePU-10</b> | 12            | 6                   | 6              | 0.6                  |
| <b>ZnPU-6</b>  | 12            | 6                   | 6              | 1                    |
| <b>ZnPU-8</b>  | 12            | 6                   | 6              | 0.75                 |
| <b>ZnPU-10</b> | 12            | 6                   | 6              | 0.6                  |
| <b>CuPU-4</b>  | 12            | 6                   | 6              | 1.5                  |
| <b>CuPU-6</b>  | 12            | 6                   | 6              | 1                    |
| <b>CuPU-8</b>  | 12            | 6                   | 6              | 0.75                 |

**Table S2.** The toughness ( $W_0$ ) and fracture toughness ( $G_c$ ) of **Neat PU**, **FePUs**, **ZnPUs** and **CuPUs**.

| Sample ID      | $W_0 / \text{MJ}\cdot\text{m}^{-3}$ | $\alpha / \text{mm}$ | $W_c / \text{MJ}\cdot\text{m}^{-3}$ | $\lambda_c$ | $G_c / \text{kJ}\cdot\text{m}^{-2}$ |
|----------------|-------------------------------------|----------------------|-------------------------------------|-------------|-------------------------------------|
| <b>Neat PU</b> | 81.38                               | 2.00                 | 0.085                               | 1.28        | 0.948                               |
| <b>FePU-6</b>  | 127.02                              | 2.00                 | 7.36                                | 7.12        | 34.7                                |
| <b>FePU-10</b> | 185.15                              | 1.00                 | 27.96                               | 13.65       | 47.5                                |
| <b>ZnPU-6</b>  | 108.31                              | 2.00                 | 18.692                              | 8.65        | 79.8                                |
| <b>ZnPU-8</b>  | 83.04                               | 2.00                 | 32.14                               | 16.04       | 97.8                                |
| <b>ZnPU-10</b> | 43.65                               | 2.00                 | 22.79                               | 21.21       | 62.2                                |
| <b>CuPU-4</b>  | 16.49                               | 1.00                 | 5.3176                              | 11.27       | 9.95                                |
| <b>CuPU-6</b>  | 77.82                               | 2.00                 | 41.21                               | 22.70       | 106.3                               |
| <b>CuPU-8</b>  | 41.26                               | 2.00                 | 11.87                               | 5.60        | 38.73                               |

**Table S3.** Comparison of toughness with other self-healing material in previous literatures [1-14].

| Sample Name          | Stress / MPa | Toughness / $\text{MJ}\cdot\text{m}^{-3}$ | Reference |
|----------------------|--------------|-------------------------------------------|-----------|
| FePU-8               | 18.36        | 228.86                                    | This work |
| PDM-2.5              | 29           | 121.8                                     | 1         |
| Cu-DOU-CPU           | 14.8         | 87                                        | 2         |
| PI-xNa               | 7            | 70                                        | 3         |
| PPGTD-IDA            | 4.83         | 65.49                                     | 4         |
| IP-SS                | 6.76         | 26.9                                      | 5         |
| PEG-DE-CAT-DAB       | 21.9         | 22                                        | 6         |
| PEIs                 | 4.4          | 12                                        | 7         |
| CB[8] based networks | 0.5          | 11                                        | 8         |
| HBP                  | 1.9          | 10                                        | 9         |
| U-PDMS               | 1.11         | 7.14                                      | 10        |
| P(DA-co-BA)          | 3.5          | 6.8                                       | 11        |
| PSeD-U20-12h         | 2.42         | 4.59                                      | 12        |
| Fe-Hpdca-PDMS        | 0.23         | 3.8                                       | 13        |
| PDMS-PtL             | 0.3          | 3.4                                       | 14        |

## References

- 1 M. Jing, X. Liu, L. Wei, K. Wu and Q. Fu, *Mater. Horiz.*, 2021, **8**, 267-275.
- 2 L. Zhang, Z. Liu, X. Wu, Q. Guan, S. Chen, L. Sun, Y. Guo, S. Wang, J. Song, E. M. Jeffries, C. He, F.-L. Qing, X. Bao, Z. You, *Adv. Mater.*, 2019, 1901402-1901509.

- 3 Y. Miwa, J. Kurachi, Y. Kohbara, S. Kutsumizu, *Commun. Chem.*, 2018, **1**, 5.
- 4 D. Wang, J. Xu, J. Chen, P. Hu, Y. Wang, W. Jiang, J. Fu, *Adv. Funct. Mater.*, 2019, 1907109-1907122.
- 5 S. Kim, H. Jeon, S. Shin, S. Park, J. Jegal, S. Y. Hwang, D. X. Oh, J. Park, *Adv. Mater.*, 2018, **30**, 1705145-1705152.
- 6 E. Filippidi, T. R. Cristiani, C. D. Eisenbach, J. H. Waite, J. N. Israelachvili, B. K. Ahn, M. T. Valentine, *Science*, 2017, **358**, 502-505.
- 7 A. Susa, R. K. Bose, A. M. Grande, S. van der Zwaag, S. J. Garcia, *ACS Appl. Mater. Inter.*, 2016, **8**, 34068-34079.
- 8 J. Liu, C. S. Y. Tan, Z. Yu, N. Li, C. Abell, O. A. Scherman, *Adv. Mater.*, 2017, **29**, 1605325.
- 9 Y. Chen, A. M. Kushner, G. A. Williams, Z. Guan, *Nat. Chem.*, 2012, **4**, 467-472.
- 10 P. Cao, B. Li, T. Hong, J. Townsend, Z. Qiang, K. Xing, K. D. Vogiatzis, Y. Wang, J. W. Mays, A. P. Sokolov, T. Saito, *Adv. Funct. Mater.*, 2018, **28**, 1800741.
- 11 J. Li, H. Ejima, N. Yoshie, *ACS Appl. Mater. Inter.*, 2016, **8**, 19047-19053.
- 12 S. Chen, L. Sun, X. Zhou, Y. Guo, J. Song, S. Qian, Z. Liu, Q. Guan, E. Meade Jeffries, W. Liu, Y. Wang, C. He, Z. You, *Nat. Commun.*, 2020, **11**, 1107
- 13 C. Li, C. Wang, C. Keplinger, J.-L. Zuo, L. Jin, Y. Sun, P. Zheng, Y. Cao, F. Lissel, C. Linder, X. You, Z. Bao, *Nat. Chem.*, 2016, **8**, 618-624.
- 14 J. Mei, X. Jia, J. Lai, Y. Sun, C. Li, J. Wu, Y. Cao, X. You, Z. Bao, *Macromol. Rapid Commun.*, 2016, **37**, 1667-1675.
